# Supplementary material
Source: Research Square preprint supplement (doi:10.21203/rs.3.rs-10194486/v1)
Supplement: Supplementary file 1 [file 70a79d67522b876f29474452.docx]

Supplementary file 2: Examples of pen portraits developed from if… then… because statements

1. **Systemic / practical demands and priorities driving discharge decisions**

Stella was admitted on a mental health ward which had a lot of difficulties around staffing, bed availability, and waiting lists. To support with these difficulties, the Trust initiated a new policy around early discharge.

As a result, one day Stella was informed that she would get discharged, without having a clear understanding of her care plan and without having been involved in the discharge related discussions. Stella spoke to staff and shared her concerns around this decision; the staff agreed with her and felt the same way.

During a multidisciplinary meeting around Stella’s care, staff shared that they do not feel they had the appropriate time to spend with Stella to support and involve her in her discharge planning process. Staff also felt that they do not have the power to change this process and complained that Stella had little control over her care plan, and she was not involved at all in important decisions around her care.

1. **Whose knowledge is valued in discharge decision-making**

George had an experience of being discharged from an acute mental health ward during last summer. George felt that his discharge was “done to him” as the staff members on the ward seemed to have made all the decisions and did not share with him any important information about his care plan or future treatment.

As a result, George felt unable to make any informed decisions around his care and his discharge, felt helpless and disempowered, and did not think that the way he got discharged was supportive.

George did not want to share his thoughts and feelings or complain about the way he got discharged, as he felt that the staff’s opinions and expertise are more important and valued than his, and that as staff, they might know best what is right for him.

1. **Preparation and developing skills as an opportunity to keep connected to life in the community**

Jonah was admitted on the acute mental health ward in North London following experiencing high levels of stress because of his job pressures. During his admission, staff encouraged Jonah to develop and practice skills of daily living, to support himself when he returns home from the ward. Jonah told staff that he particularly enjoyed cooking his own meals and going for his daily walks at the park.

Following his discharge, the ward staff phoned Jonah to ask him how he was feeling; Jonah told staff that he continues to go for his walks at the park near his house, and that he had started experimenting with his cooking. Jonah said that he was very pleased with himself, as he had invited his friends over for dinner, and they all enjoyed Jonah’s cooking.
