# Supplementary material
Source: Research Square preprint supplement (doi:10.21203/rs.3.rs-10194486/v1)
Supplement: Supplementary file 2 [file 8feffb631ebb9489aa813c3e.docx]

Supplementary file 3: Theory development

Table 1: If… then… because statements

| # | Working title | If | Then | because | References contributing |
| --- | --- | --- | --- | --- | --- |
| 1 | **Procedures align with service user readiness for discharge** | Trust policies set out requirements for notice periods of discharge | May prevent unplanned, sudden discharge, but may also cause dissatisfaction with people who feel ready to leave | People’s readiness for discharge has not been recognised or is difficult to discern and the timing of essential processes have not aligned | Cutcliffe 2012  Understanding the Risks of Recent Discharge |
| 2 | **Systemic / practical demands and priorities driving discharge decisions** | System demands and priorities (e.g. demands on service resources (e.g. bed pressures, access to community support, staff time) and system pressures (e.g. incentives/policy requirements for early discharge?)) drive the discharge process | People on the ward are likely to experience a disorganised discharged with limited involvement from themselves or their families in discharge planning. Both people who use services and staff experience anxious feelings and that discharge was unsatisfactory. | Staff feel they do not have the time to spend in discharge planning with people on the ward, do not have suitable knowledge that can inform discharge planning and what is known is not known by all care partners and therefore feel powerless to change how discharge will occur. Staff may consider people on the ward will have little control over plans, and consider their involvement as futile. |  |
| 3 | **Perceptions of a ‘worthy’ service user affecting staff engagement with discharge discussions** | If staff perceive some people to be ‘not ill’ or ‘not ill enough’ | People with less complex needs, diagnoses considered less serious and those deemed to be quiet may be more likely to discharges that are negative | Conceptualisations of what constitutes ‘the right kind of’ a person who uses services. |  |
| 4 | **Tensions between what staff and organisations value as ‘real work’** | If staff feel that the real work with people who use services (spending time with them, getting to know the person etc) is not valued by the organisation as much as measurable, target driven tasks. | Staff will make pragmatic decisions for what work they prioritise and will likely have decreased job satisfaction | Staff will feel conflicted between what they consider to be good care with service users and meeting the expectations of their role (cognitive dissonance). Staff will consider they are unable to make a positive difference. |  |
| 5 | **Regular supervision providing a space to work through secondary trauma** | Regular, protected clinical supervision is available and attended by staff to explore and reflect on their day-to-day experiences. | Supervision can provide them with strategies for coping and self-care needed for their role and will lead them to be more effective in their work with service users. | Staff gain insights into the impact of work pressures, including the impact of secondary trauma and how we defend ourselves against its effects and have a space for challenges to be acknowledged and worked through |  |
| 6 | **The structure and routines of hospital impacting concerns for discharge** | If people who use services adapt to and rely upon the hospital structure and routine of hospital life | People may feel anxious/worried at the thought of and actual lack of routine and activity in their community life. | There has been reinforcement / normalisation of what is considered safe and what is not safe) and people may feel disempowered by everything ‘being done for them’ and not being involved with or having responsibility for decisions and actions. | Cutcliffe 2012 Understanding the Risks of Recent Discharge |
| 7 | **Preparation and developing skills as an opportunity to keep connected to life in the community** | Preparing people on the ward for discharge and supporting them to carry on with everyday tasks and activities during their admission is understood as a way to support people with coping with potential difficulties in the community following discharge. | may have a positive impact on people’s sense of self, develop their confidence in completing tasks of daily living and may reduce the “shock” of discharge. | Activities provide opportunities for people to remain connected to their roles in the community and ongoing events |  |
| 8 | **Coping with difficulties** | If people have not been or feel they are not adequately prepared/equipped for discharge (including worries around unresolved issues and returning to an environment associated with difficult experiences, having an understanding the difference between being well enough to leave and being better, feeling that recovery is incomplete) | People may use strategies they have used in the past to avoid intense, uncomfortable, or negative feelings. | People may struggle to understand what led to their distress and are likely to impact discharge outcomes. Discussions of strategies that might be useful and helpful have not been discussed. There may be an expectation that discharge ‘will not work’. | Cutcliffe 2012  Understanding the Risks of Recent Discharge (and other Cutcliffe) |
| 9 | **Gradual transitions to reduce anxiety for returning to the community** | Discharge planning takes a gradual approach (e.g. home visits prior to discharge) and prepares people for going back to their roles and their networks in the community | People will be less anxious about returning to the community and will have a better understanding of things that have or have not changed | People will have been helped to transition to their life in the community slowly, consider aspects of going home and have time to reflect on what else might need to be addressed and who can support them with that (e.g. providing safe spaces for identifying and confront the challenges) |  |
| 10 | **Peer support and connection to build trusting relationships for discharge** | There are opportunities to access peer support during the discharge planning process | Improving the likelihood that people on the ward will build positive, trusting relationships with peer supporters who may influence the experience of discharge. | Peer support recognised as credible from their lived experience generating a sense of connection. |  |
| 11 | **The impact of relationships with other people on the ward** | If people develop strong relationships other people on the ward during their stay | This might influence how people feel about being discharged and whether they consider or not they are ready to leave | People might experience bereavement and loss of relationships that have developed through shared experiences. | Cutcliffe 2012 Understanding the Risks of Recent Discharge (and other Cutcliffe paper) |
| 12 | **Exploring self-management strategies and ways of dealing with challenging situations** | Offering support to people on the ward and their families about their difficulties and exploring different coping strategies | Increase people’s, their families’ and staff understanding about a person’s difficulties, more workable ways to support their distress which may help reduce experiences of severe difficulties and support people to engage with their care and treatment plans. | Self-efficacy in supporting with own difficulties and how to cope with challenging personal and social situations in the community, recognition of distress and knowing how to access help and support. Empowering people to support themselves and to live well with their difficulties. |  |
| 13 | **Stigma and burden inhibiting collaborative discharge planning** | People who use services have concerns about how their admission to a mental health hospital is viewed by others (and society) and is a reflection on them as a person. | They are less likely to involve family or other supporters in discharge planning | They feel shame and a burden to their families and consider they are unworthy of their support | Cutcliffe 2012 Understanding the Risks of Recent Discharge (and other Cutcliffe) |
| 14 | **Engaging with care plans to maintain a level of control in care and avoid involuntary admissions** | People disagree with care plans but want to avoid getting admitted on the ward on a involuntary basis and maintain a level of control in their care | People will follow their care plans and related requirements (such as taking prescribed medication) | People on the ward are aware of the power imbalance and fear they will lose control over all aspects of their care if they do not engage with treatment plans as they are expected to. | Cutcliffe (other paper) |
| 15 | **Whose knowledge is valued in discharge decision-making** | Discharge is ‘done to you’ (staff make all decisions surrounding a person’s discharge and do not share key information about care and treatment) | People who use services will be unable to make informed decisions around discharge, will feel helpless and disempowered and not view discharge as supporting their recovery. | Certain staff opinions and expertise are valued more highly than these of the people who use services/ it is unclear who has the ‘right’ to information and knowledge? There is an ‘acceptance’ from people that staff know best (Power imbalances) | Cutcliffe 2012 Understanding the Risks of Recent Discharge |
| 16 | **Accessible, transparent information supports service users’ to be involved in discharge planning** | People on the ward and family members or close companions are provided with information about their admission and/or difficulties that they can understand and act upon. They are actively involved in decisions to tailor discharge preparation and planning to their needs, including communicating full and respectful information about why staff may have alternative preferences for plans. | People will have more influence how their transition is managed and for how they can be supported with their mental health difficulties. This may mean they will be more likely to follow their treatment plan. | People feel they have been involved in and have a better understanding for how decisions for discharge planning have been made. and experience reciprocal relationships with staff rather than paternalistic ones  People will feel listened to and have clarity about why staff may suggest different clinical treatment or activities. | Partial from Cutcliffe 2012 Understanding the Risks of Recent Discharge |
| 17 | **Capturing useful and timely information to inform an integrated approach to discharge** | Discharge planning that works within existing systems and service to capture agreed, standardise information (including that related to a person’s personal circumstances and needs in the community) is collected from the point of admission | The quality and timeliness of information captured during an admission may be useful for a better managed discharge. | There is integration and coordination of information across systems and services which is understood by everyone with a responsibility for a person’s discharge. |  |

Table 2: initial programme theories developed from if… then… because statements

| IPT #  (if… then #) | **Working title** | Context | Mechanism | Outcome |
| --- | --- | --- | --- | --- |
| 1 (1) | **Procedures align with personalised care** | The trust provides different policies for different diagnoses and their treatment | Staff are restricted in what they are able to offer people who do not meet a certain diagnosis or risk level which may make them feel powerless | Personalised care is not possible |
| 2 (2) | Systemic / practical demands and priorities driving discharge decisions | System demands and priorities (e.g. demands on service resources (e.g. bed pressures, access to community support, staff time) and system pressures (e.g. incentives/policy requirements for early discharge) drive the discharge process | Staff feel they do not have the time to spend in discharge planning with people on the ward, do not have suitable knowledge that can inform discharge planning and what is known is not known by all care partners and therefore feel powerless to change how discharge will occur. Staff may consider people on the ward will have little control over plans, and consider their involvement as futile. | People on the ward are likely to experience a disorganised discharged with limited involvement from themselves or their families in discharge planning. Both people who use services and staff experience anxious feelings and that discharge was unsatisfactory. Staff may avoid a discharge meeting if they feel that the person isn’t ready for discharge (but must be discharged due to system pressures) and therefore discharge is not organised appropriately due to time pressures |
| 3 (3, 4, 5) | Environment factors that promote person-centred v task focused care | If staff work in a threat based on environment (lack of staff, like of time, no training, no supervision, blame culture on the ward), and they receive no ongoing training or supervision or supervision which is cancelled a lot due to lack of knowledge about how to supervise and it’s not a ward priority,  Staff may also feel that the organisation prioritises measurable, task driven tasks over time with service users | Staff may be burnt out or have lost compassion as they are not able to work through the psychological pain of working on a ward and looking after people in psychological pain.  They may no longer be able to communicate well with people on the ward and there is no clear model of care.  Staff will feel conflicted between what they consider to be good care and meeting the expectations of their role (cognitive dissonance). Staff may feel they are unable to make a positive difference. | Staff will make pragmatic decisions for what work they prioritise and will likely have decreased job satisfaction & detailed discharge planning will not happen. |
| 4  (6, 7, 8, 9) | **Safety of ward and levels of dependency affecting sense of self and self-efficacy**  Preparedness | At the time of an admission, people are likely to find it difficult to complete all aspects of everyday tasks, such as meal preparation. People may perceive the ward as safe (or not) of the ward and may develop a level of dependency through relinquished responsibilities during time on the ward. | As their stay continues, the ward environment/culture, and access to support for practical and emotional transition for how people will manage their everyday responsibilities affects a person’s sense of self (i.e. role of patient or person) and sense of self-efficacy. | Discharge may be experienced as overwhelming where they have become reliant on the structure to their day that being on the ward provides. Some people may be keen to be discharged and regain control over how their day is organised. |
| 5 (10, 11) | Relationships with other service users | Inpatient wards are communal living spaces. For people who are temporarily accommodated on the ward, the support and comfort they find from other service users (both others who are also currently living on the ward and those who are working as peer supporters) will be different from that provided by staff and family and will also contribute to how a person anticipates discharge. | Friendships can develop through connections between service users who have shared experiences. Camaraderie can strengthen a person’s belief that recovery is possible and share and improve understanding of their option. Peer support workers can demonstrate this possibility through their work, providing credible evidence of what a form of recovery can look like. | People may develop a more positive view of their own discharge, but may also have to adjust to temporarily losing the support of good friends when discharges do not occur at the same time. Where service users have shared types of coping mechanisms for their difficulties this may be positive or negative. |
| 6 (12, 13) | Engaging care partners in discharge discussions | A person’s admission can be difficult for families to accept. However, it is important that a person is supported by someone they trust to increase the possibility of a ‘good’ discharge. Families may need their own support to overcome the challenges they face to support the person well. Ideally, discussions would set out the level of involvement a supporter can expect to have in relation to the person and address their own needs to help them understand the difficulties a person is facing. | The person and their family may find it difficult to engage as care partners for discharge if family members do not understand the person’s condition, blame themselves and/or feel guilty for the person’s illness, or concerns for what other people will think. Involvement of an appropriate supporter will be more problematic where families are considered to have some responsibility for a person’s illness. Staff understanding and restrictions around confidentiality and legal issues can further complicate sharing information. | A person will have support from someone outside of the professional care team who can help them to make sense of their admission and support them with their discharge. |
| 7 (3, 14) | Staff perceptions of service user identity impacting trust and fears of not being in control | Expressions of distress for a person experiencing a mental health crisis can be challenging for staff to cope with, particularly if they do not have the appropriate knowledge about different conditions, have misconceptions about different diagnoses and perceive some people to be less deserving of empathy and care (i.e. blame the person or perceive some people as not having capacity to have a say (and other stigmatising attitudes)). | Staff perceptions of individual service users and service users’ fear of how this may impact their inpatient experiences and access to treatment. | Will impact the level of trust between service users and staff and may led service users to act differently during their stay to maintain a level of control in their discharge. |
| 8  (15, 16, 17) | Transparency to support shared decision making for discharge | Transparent approaches that include honest, open discussions between staff, the person on the ward and the person who supports them and are supplemented with comprehensive records of discussions will help service users trust that decisions have been made with them. However, this information is not always shared with service users by staff and service users may only find out about their rights from experience of previous admissions or discussions with other service users. | Service users (people on the wards) have a say about their management and treatment plans for their condition (including possible and ‘established’ diagnosis) and therapy, activities and support they can access on the ward and post-discharge. Where transparent approaches are lacking, service users will need to be capable of advocating for themselves despite the challenges they face from their illness and the power imbalances between them and staff. | The parity of discussions and decision-making between service users and staff may be improved where service users are better informed and able to engage with discharge planning from a position of knowledge by understanding the options available to them within the ward and post-discharge. |

Table 3: Moving from initial programme theories to refined programme theories

| IPT/PT #  (if… then #) | **Working title** | Context | Mechanism | Outcome |
| --- | --- | --- | --- | --- |
| IPT 1 (1) | **Procedures align with personalised care** | The trust provides different policies for different diagnoses and their treatment | Staff are restricted in what they are able to offer people who do not meet a certain diagnosis or risk level which may make them feel powerless | Personalised care is not possible |
| IPT 2 (2) | Systemic / practical demands and priorities driving discharge decisions | System demands and priorities (e.g. demands on service resources (e.g. bed pressures, access to community support, staff time) and system pressures (e.g. incentives/policy requirements for early discharge) drive the discharge process | Staff feel they do not have the time to spend in discharge planning with people on the ward, do not have suitable knowledge that can inform discharge planning and what is known is not known by all care partners and therefore feel powerless to change how discharge will occur. Staff may consider people on the ward will have little control over plans, and consider their involvement as futile. | People on the ward are likely to experience a disorganised discharged with limited involvement from themselves or their families in discharge planning. Both people who use services and staff experience anxious feelings and that discharge was unsatisfactory. Staff may avoid a discharge meeting if they feel that the person isn’t ready for discharge (but must be discharged due to system pressures) and therefore discharge is not organised appropriately due to time pressures |
| PT1* | Resource limitations and hierarchical decision-making | System pressures, such as drives for efficient bed management, significantly impacted staff discharge decision making and planning processes | Cross disciplinary discussions to clarify a rounded understanding of service users’ needs was not always possible. This led to staff concerns that discussing discharge would falsely raise service users’ expectations for the level of influence they had for discharge decisions. Consequently, staff believed service user involvement in the discharge planning process would be meaningless (mechanism response). | Thus, until discharge arrangements were finalised, they were not discussed with service users (outcome), meaning service users experienced discharge as unexpected and disorganised (outcome). |
| IPT 3 (3, 4, 5) | Environment factors that promote person-centred v task focused care | If staff work in a threat based on environment (lack of staff, like of time, no training, no supervision, blame culture on the ward), and they receive no ongoing training or supervision or supervision which is cancelled a lot due to lack of knowledge about how to supervise and it’s not a ward priority,  Staff may also feel that the organisation prioritises measurable, task driven tasks over time with service users | Staff may be burnt out or have lost compassion as they are not able to work through the psychological pain of working on a ward and looking after people in psychological pain.  They may no longer be able to communicate well with people on the ward and there is no clear model of care.  Staff will feel conflicted between what they consider to be good care and meeting the expectations of their role (cognitive dissonance). Staff may feel they are unable to make a positive difference. | Staff will make pragmatic decisions for what work they prioritise and will likely have decreased job satisfaction & detailed discharge planning will not happen. |
| PT2 | Managing dissonance between professional values and systemic risk | System-level risk governance requirements and priorities could be a threat to staffs’ personal and professional values | Access to regular clinical supervision and emotional support to manage this dissonance (mechanism resource) was thought to help staff manage the conflict between their values and ward requirements so that they felt able to engage with, rather than emotionally withdraw from, interactions with service users | This could increase the likelihood of building relationships between staff and service users conducive to collaborative discharge planning |
| IPT 4**  (6, 7, 8, 9) | **Safety of ward and levels of dependency affecting sense of self and self-efficacy** | At the time of an admission, people are likely to find it difficult to complete all aspects of everyday tasks, such as meal preparation. People may perceive the ward as safe (or not) of the ward and may develop a level of dependency through relinquished responsibilities during time on the ward. | As their stay continues, the ward environment/culture, and access to support for practical and emotional transition for how people will manage their everyday responsibilities affects a person’s sense of self (i.e. role of patient or person) and sense of self-efficacy. | Discharge may be experienced as overwhelming where they have become reliant on the structure to their day that being on the ward provides. Some people may be keen to be discharged and regain control over how their day is organised. |
| PT3 | **Everything is done for/to you on the ward** | For some service users, admission provided a structure to their day, a sense of security and respite from aspects of their lives that were difficult to manage immediately prior to their admission | Gradual discharge with reflection of these experiences and actions for identified challenges (mechanism resource) could help service users to safely adjust to how they will manage in the community without feeling deskilled and shocked at returning to life off the ward | This could benefit their recovery and reduce the need for readmission |
| PT4 | Psychological and practical readiness for discharge | Discharge is a time of uncertainty when service users may question their ability to cope with their responsibilities outside the ward | Joint planning, opportunities to develop life skills and regular reviews that acknowledge service users progress in their recovery could build self-belief and self-efficacy that they can manage their everyday life and have a sense of agency over the discharge process | This psychological preparedness for discharge may reduce distress and anxiety around leaving the ward |
| IPT 5 (10, 11) | Relationships with other service users | Inpatient wards are communal living spaces. For people who are temporarily accommodated on the ward, the support and comfort they find from other service users (both others who are also currently living on the ward and those who are working as peer supporters) will be different from that provided by staff and family and will also contribute to how a person anticipates discharge. | Friendships can develop through connections between service users who have shared experiences. Camaraderie can strengthen a person’s belief that recovery is possible and share and improve understanding of their option. Peer support workers can demonstrate this possibility through their work, providing credible evidence of what a form of recovery can look like. | People may develop a more positive view of their own discharge, but may also have to adjust to temporarily losing the support of good friends when discharges do not occur at the same time. Where service users have shared types of coping mechanisms for their difficulties this may be positive or negative. |
| PT5 | Peer connectedness and mutual support | Where ward environments allowed for and facilitated conversations and mutual support between service users | Service users could build understanding through others with shared experiences of mental illness, ward life, and discharge. This could foster confidence and agency for collaborative conversations with staff | Service users may be more likely to express needs and request resources that could support personal recovery and plans for discharge |
| IPT 6 (12, 13) | Engaging care partners in discharge discussions | A person’s admission can be difficult for families to accept. However, it is important that a person is supported by someone they trust to increase the possibility of a ‘good’ discharge. Families may need their own support to overcome the challenges they face to support the person well. Ideally, discussions would set out the level of involvement a supporter can expect to have in relation to the person and address their own needs to help them understand the difficulties a person is facing. | The person and their family may find it difficult to engage as care partners for discharge if family members do not understand the person’s condition, blame themselves and/or feel guilty for the person’s illness, or concerns for what other people will think. Involvement of an appropriate supporter will be more problematic where families are considered to have some responsibility for a person’s illness. Staff understanding and restrictions around confidentiality and legal issues can further complicate sharing information. | A person will have support from someone outside of the professional care team who can help them to make sense of their admission and support them with their discharge. |
| PT6 | Involvement of external support network in discharge planning | For some service users, including supporters in collaborative discharge planning could be beneficial (although for others, this might be unhelpful) | ). Clear processes, procedures and responsibilities for staff to follow that could be adapted in ways that were sensitive to different relationships and interpretation of the service user’s personal recovery needs supported people that are significant within a service user’s support network to consider and make sense of both the service user’s and their needs around the process of discharge. | This was likely to lead to meaningful and considered discussions that could create the conditions for a ‘successful’ discharge. |
| IPT 7 (3, 14) | Staff perceptions of service user identity impacting trust and fears of not being in control | Expressions of distress for a person experiencing a mental health crisis can be challenging for staff to cope with, particularly if they do not have the appropriate knowledge about different conditions, have misconceptions about different diagnoses and perceive some people to be less deserving of empathy and care (i.e. blame the person or perceive some people as not having capacity to have a say (and other stigmatising attitudes)). | Staff perceptions of individual service users and service users’ fear of how this may impact their inpatient experiences and access to treatment. | Will impact the level of trust between service users and staff and may led service users to act differently during their stay to maintain a level of control in their discharge. |
| PT7 | Changing one’s behaviours to manage staff perceptions | Relationships between service users and ward staff that were of sufficient quality to facilitate conversations related to discharge | took time to build, relying on a consistent series of constructive interactions that could cumulatively sustain connection and trust between service users and staff. Service users who felt the relationship was vulnerable to staff opinions and misconceptions of them, wanted to maintain or regain a sense of control over how staff perceived them | and might try to act in ways that aligned with staff expectations of service user characteristics and behaviours considered suited to being on the ward |
| IPT 8  (15, 16, 17) | Transparency to support shared decision making for discharge | Transparent approaches that include honest, open discussions between staff, the person on the ward and the person who supports them and are supplemented with comprehensive records of discussions will help service users trust that decisions have been made with them. However, this information is not always shared with service users by staff and service users may only find out about their rights from experience of previous admissions or discussions with other service users. | Service users (people on the wards) have a say about their management and treatment plans for their condition (including possible and ‘established’ diagnosis) and therapy, activities and support they can access on the ward and post-discharge. Where transparent approaches are lacking, service users will need to be capable of advocating for themselves despite the challenges they face from their illness and the power imbalances between them and staff. | The parity of discussions and decision-making between service users and staff may be improved where service users are better informed and able to engage with discharge planning from a position of knowledge by understanding the options available to them within the ward and post-discharge. |
| PT8 | Having a voice and adequate sharing of information | Discharge discussions where service users felt able and safe to share details about themselves, life outside the ward, and relevant experiences with staff | were reliant on service user perception of the accuracy and completeness of information written and shared about them, and confidence that this information would be used in a non-judgemental way (mechanism resource). This contributed to whether service users felt heard, understood and their sense of agency both in relationships with staff and the discharge planning process | affecting how service users engaged in the discharge planning process and whether discharge plans were individually beneficial and relevant |

* IPTs 1 and 2 were merged to form PT1, ** IPT 4 was separated into PT 3 and 4
