# Supplementary material
Source: Research Square preprint supplement (doi:10.21203/rs.3.rs-10194486/v1)
Supplement: Supplementary file 3 [file fa2ce5dc2175279dc5f6e468.docx]

Supplementary file 1

Table 1: Evidence searches based on IPTs

| Broad IPT concepts | Culture OR Ethos OR Values OR Environment OR “Staff attitude*” OR Atmosphere OR Size OR “Staff characteristic*” Or “Staff behaviour” OR “Working method*” OR “Structural elements” OR Schedules OR “Resource restrained” OR “Resource competitive” OR Leadership OR Manage* OR “Shared decision making” OR “Collaboration” OR “Partnership” OR “Participation” OR “Person centred” OR “Client centred” OR “Patient centred” OR Need OR Preparation OR Readiness OR Uncertainty OR “Emotional support” OR Relationship* OR Trust OR Respect OR “Shared experience*” OR Connection OR Interpersonal OR Communication OR Friendship* OR Interaction* OR “Alignment of routines” OR “Social network*” OR “Peer*” OR Stigma OR Shame OR Guilt OR Embarrassment OR Burden OR Burnout OR Policy OR Policies OR Power OR Empowerment OR Influence OR Autonomy OR Agency OR Disempowerment OR Risk OR “Safety planning” OR Control OR Self-determination OR Recognition OR Ownership OR Institutionalisation OR “Openness of process” OR “Meaningful goals” OR Knowledge OR Expertise OR “Interdisciplinary team” OR “Health service” OR “Health system” OR “Service system” OR Documents OR Processes OR Procedures OR “Care planning” OR Contact OR Coordination OR Occupation OR Engagement OR Homelessness OR Diagnosis OR Dissonance OR Moral injury OR “Voluntary admission” OR “Involuntary admission” OR Section  AND |
| --- | --- |
| Mental Health | “mental disorder*” OR “mental health” OR “mental illness*” OR schizophr* OR depress* OR “affective disorders” OR “mood disorder*” OR bipolar OR suicid* OR “posttraumatic stress disorder” OR PTSD OR psychiatric OR psychological  AND |
| Discharge | discharge* OR transfer* OR handover* OR transition* OR continuity OR leav* OR pre-discharge OR post-discharge OR “integrated care pathway”  AND |
| Inpatient | Inpatient* OR Unit*OR hospital*OR ward*OR acute OR care OR service* |
